# Supplementary material for: Micro- to nano-sized solid inclusions in magnetite record skarn reactions
Source: Copernicus journal article supplement (doi:10.5194/ejm-36-925-2024), 2024-10-29
Supplement: Supplementary file 1 [file ejm-36-925-2024-supplement.zip]

## Sheet: EPMA conditions
	Table S1. Analytical conditions for each element measured for silicates on EPMA							Table S2. Analytical conditions for each element measured for oxides on EPMA
	Element	Standard	X-Ray	Crystal	Channel	Acc. V (kV)		Element	Standard	X-Ray	Crystal	Channel	Acc. V (kV)
	Na	Albite	Kα	LTAP	4	20		Mg	Periclase	Kα	LTAP	4	20
	Mg	Periclase	Kα	LTAP	4	20		Al	Corundum	Kα	LTAP	5	20
	Si	SiO2	Kα	LTAP	5	20		Si	SiO2	Kα	LTAP	5	20
	Al	Corundum	Kα	LTAP	5	20		Fe	Hematite	Kα	LLIF	3	20
	Fe	Hematite	Kα	LLIF	3	20		Mn	MnTiO3	Kα	LLIF	3	20
	Mn	MnTiO3	Kα	LLIF	3	20		Ti	Rutile	Kα	LPET	1	20
	Cl	Vanadinite	Kα	LPET	1	20		Ni	NiO	Kα	LLIF	3	20
	Ca	Diópside	Kα	LPET	1	20		Zn	ZnS	Kα	LLIF	3	20
	Ti	Rutile	Kα	LPET	1	20		Co	Co	Kα	LLIF	3	20
	Cr	Cr2O3	Kα	LLIF	3	20		Cr	Cr2O3	Kα	LPET	2	20
	Ni	NiO	Kα	LLIF	3	20		V	Vanadinite	Kα	LPET	2	20

## Sheet: Silicates
	Table S3. Results of EPMA analyses of silicates
	Sample	Analysis	Phase	SiO2	Al2O3	MgO	FeO	CaO	MnO	Na2O	Cr2O3	NiO	TiO2	Cl-	TOTAL		Si	Al	Mg	Fe	Ca	Mn	Na	Cr	Ni	Ti	Mg#
	Forsterite zone
	V3	V-3_c_4	Forsterite	40.16	0.1477	52.68	2.88	0.0469	0.0405	0.0071	0.072	0	0	0.0537	96.0342		0.99343	0.0043058	1.94274	0.0595716	0.00124291	0.000848471	0.000340494	0.00140806	0	0	0.970249
		V-3_c_5	Forsterite	38.43	0	57.59	2.86	0.0154	0.0781	0	0.0623	0	0	0.017	99.0358		0.930147	0	2.07804	0.0578829	0.000399322	0.00160092	0	0.0011921	0	0	0.9729
		V-3_c_6	Forsterite	42.11	0.0012	54.06	6.31	0.0121	0.1638	0	0.0287	0	0.0153	0.001	102.701		0.989073	3.32165e-05	1.89297	0.12393	0.000304474	0.00325834	0	0.00053293	0	0.000270288	0.938554
		V-3_c_7	Forsterite	42.23	0.0107	54.3	6.17	0.0443	0.1934	0	0.0427	0	0	0.0125	102.991		0.988695	0.000295226	1.89525	0.12079	0.00111113	0.00383474	0	0.00079034	0	0	0.940086
		V-3_c_10	Forsterite	41.94	0	54.03	6.29	0.0193	0.1367	0.0188	0.0575	0	0.0566	0	102.549		0.986844	0	1.89531	0.123758	0.000486518	0.00272413	0.000857603	0.00106963	0	0.00100168	0.938705
		V-3_c_1	Serpentine (Srp-2)	41.2	0.0466	42.07	2.09	0.0215	0	0.0057	0.0564	0	0	0.0605	85.4902		3.92267	0.00522914	5.97131	0.166414	0.00219323	0	0.00105223	0.00424564	0	0	0.972887
		V-3_c_2	Serpentine (Srp-2)	39.89	0.1002	41.6	3.05	0.0142	0.0298	0.0032	0.0525	0.009	0	0.1048	84.7489		3.86111	0.0114308	6.0028	0.246892	0.00147264	0.00244317	0.000600549	0.00401778	0.00070062	0	0.960495
		V-3_c_3	Serpentine (Srp-2)	40.34	0.0579	41.7	2.99	0.039	0.0409	0.0063	0.0578	0	0	0.1203	85.2319		3.87887	0.00656155	5.97746	0.240436	0.00401786	0.00333105	0.00117452	0.00439416	0	0	0.961332
		V-3_c_9	Serpentine (Srp-2)	39.56	0.0827	41.15	3.91	0.0384	0.0342	0.0062	0.0401	0.0014	0.0088	0.1227	84.8318		3.84559	0.00947483	5.96333	0.317865	0.00399944	0.00281593	0.00116855	0.00308198	0.000109453	0.0006433	0.949394
	Diopside zone
	V9	V-9_a_1	Diopside	55.03	0.0531	18.75	0.5054	26.19	0.0129	0.0034	0.0604	0	0.0426	0.0051	100.648		1.98024	0.00225187	1.00588	0.0152075	1.00966	0.00039314	0.000237195	0.00171831	0	0.00115298	0.985107
		V-9_a_2	Diopside	53.4	1.5664	16.98	2.74	25.95	0.0381	0.0163	0.0295	0.007	0.0271	0.0063	100.754		1.94059	0.0670849	0.919929	0.0832618	1.0103	0.00117262	0.00114839	0.000847537	0.000204624	0.000740718	0.917003
		V-9_a_3	Diopside	53.36	1.3724	16.9	2.72	25.83	0.0316	0.0165	0.0546	0.0539	0	0.0029	100.339		1.94699	0.0590145	0.919304	0.0829888	1.0097	0.000976503	0.00116719	0.00157502	0.00158199	0	0.917201
		V-9_a_4	Diopside	54.04	0.6578	18.35	0.609	25.92	0.0565	0.021	0.0453	0.0184	0.1696	0.0026	99.8876		1.96189	0.0281438	0.993162	0.0184876	1.00813	0.00173719	0.00147804	0.00130018	0.000537334	0.00463102	0.981725
		V-9_a_5	Diopside	54.56	0.0362	18.2	0.8767	25.72	0	0.0315	0.0349	0.0492	0.0442	0.0099	99.5527		1.98662	0.00155338	0.987953	0.0266928	1.00331	0	0.00222361	0.00100464	0.00144103	0.00121047	0.973692
		V-9_a_6	Diopside	53.24	0.1654	18.29	1.43	25.13	0.0319	0.0176	0.0453	0.0209	0.0402	0.0027	98.4113		1.96781	0.00720461	1.00782	0.0441961	0.995084	0.000998561	0.00126115	0.0013237	0.000621382	0.00111754	0.957989
		V-9_b_1	Diopside	53.29	1.0181	17.86	1.62	25.81	0.0239	0.0277	0.0304	0.0544	0.2245	0	99.959		1.94399	0.0437693	0.971304	0.0494159	1.00869	0.000738389	0.00195901	0.000876733	0.0015963	0.00615966	0.951587
		V-9_b_2	Diopside	54.61	0.4088	18.28	1.65	25.4	0.031	0.0394	0.0463	0.0241	0.0592	0.0045	100.549		1.97369	0.017412	0.984935	0.0498647	0.983472	0.00094887	0.00276065	0.00132292	0.000700634	0.00160924	0.951812
		V-9_b_3	Diopside	50.49	2.39	16.94	4.34	23.29	0.0514	0.0225	0.0685	0.0822	0.0768	0.0009	97.7514		1.90089	0.106042	0.950799	0.136629	0.939381	0.0016389	0.00164226	0.00203885	0.00248937	0.00217472	0.874356
		V-9_b_7	Diopside	54.14	0.546	18.34	1.64	25.38	0.1107	0.0068	0.0568	0.0226	0.1087	0.0147	100.352		1.96281	0.0233282	0.99125	0.0497171	0.985763	0.00339895	0.000477943	0.00162799	0.000659075	0.00296401	0.952239
		V-9_b_8	Diopside	54.39	0.9046	17.66	1.69	25.97	0.0309	0.0053	0.0485	0	0.1447	0.0051	100.844		1.96296	0.038475	0.950184	0.0510014	1.00412	0.000944473	0.000370831	0.00138382	0	0.00392783	0.949059
		V-9_b_9	Diopside	54.32	0.3477	17.93	1.1882	25.83	0	0.0013	0.035	0.0295	0.0634	0.0084	99.7451		1.97752	0.0149175	0.973118	0.0361704	1.00741	0	9.17512e-05	0.00100733	0.000863873	0.00173597	0.964162
		V-9_b_5	Serpentine (Srp-1)	39.77	0.0737	36.56	8.36	0.0502	0.2297	0	0.0472	0.1094	0.0634	0.1631	85.2636		3.93062	0.00858483	5.38671	0.690989	0.00531582	0.0192289	0	0.0036883	0.00869589	0.00471214	0.886307
		V-9_b_6	Serpentine (Srp-1)	39.94	0.0313	37.34	7.39	0.0292	0.144	0	0.0506	0.0796	0	0.1405	85.0047		3.93613	0.00363551	5.4859	0.609067	0.00308323	0.0120202	0	0.00394267	0.00630908	0	0.90007
		V-9_b_10	Serpentine (Srp-1)	39.34	0.1156	33.71	10.1	0.047	0.3222	0.0063	0.0158	0.2827	0.0285	0.1312	83.9681		3.98514	0.0138015	5.09073	0.855639	0.00510116	0.0276455	0.00123737	0.00126545	0.0230318	0.00217109	0.856107
		V-9_c_1	Serpentine (Srp-1)	39.49	0.0254	34.99	10.19	0.0236	0.1931	0.0073	0.0245	0.2195	0.0147	0.2015	85.1781		3.94526	0.00299076	5.21129	0.851378	0.00252617	0.0163403	0.00141404	0.00193524	0.0176366	0.00110441	0.85957
		V-9_c_2	Serpentine (Srp-1)	39.33	0.0374	34.62	10.12	0.046	0.2083	0.0031	0.0397	0.2828	0.0135	0.3202	84.7008		3.95209	0.00442929	5.18612	0.850439	0.00495248	0.0177289	0.00060397	0.00315408	0.0228546	0.00102014	0.859118
		V-9_c_5	Serpentine (Srp-1)	39.32	0.0187	34.39	10.18	0.0308	0.1841	0.007	0.0214	0.3161	0	0.103	84.4681		3.96229	0.00222093	5.16627	0.857908	0.00332541	0.0157136	0.00136767	0.00170501	0.0256182	0	0.857589
		V-9_c_6	Serpentine (Srp-1)	39.91	0.0033	35.04	10.06	0.0241	0.2795	0.006	0.0442	0.2741	0.0099	0.0689	85.6511		3.9618	0.000386086	5.18546	0.835158	0.00256324	0.0235008	0.00115482	0.00346906	0.0218832	0.000739044	0.861284
		V-9_c_7	Serpentine (Srp-1)	38.46	0.0197	35.77	9.81	0.0355	0.2296	0.0109	0.0161	0.1884	0.021	0.2261	84.5612		3.87564	0.0023397	5.3736	0.826729	0.00383287	0.0195973	0.00212967	0.00128274	0.0152689	0.0015914	0.866664
		V-9_a_7	Serpentine (Srp-2)	41.89	0.0078	40.69	3.03	0.0143	0.0747	0.0128	0.0533	0.1086	0.0013	0.068	85.8828		3.98327	0.000874144	5.76805	0.240952	0.00145689	0.00601643	0.00235988	0.00400715	0.00830521	9.29601e-05	0.959901
		V-9_c_3	Serpentine (Srp-2)	42.35	0.1928	40.53	3.01	0.0087	0.0664	0	0.0466	0.0883	0.0128	0.025	86.3056		4.00094	0.0214672	5.70817	0.237812	0.00088062	0.00531332	0	0.00348075	0.00670904	0.000909374	0.960005
		V-9_c_4	Serpentine (Srp-1)	39.32	0.0187	34.39	10.18	0.0308	0.1841	0.007	0.0214	0.3161	0	0.103	84.4681		3.96229	0.00222093	5.16627	0.857908	0.00332541	0.0157136	0.00136767	0.00170501	0.0256182	0	0.857589
	Mg#: Mg/(Mg+Fe2+)
	Forsterite based on 4O. Diopside based on 6O. Serpentine based on 14O

## Sheet: Magnetite
	Table S4. Results of EPMA analyses of magnetite
	Sample	Analysis	Texture	Phase	Location	SiO2	TiO2	V2O5	Al2O3	Cr2O3	FeOt	MnO	MgO	CoO	NiO	ZnO	TOTAL	FeO	Fe2O3	TOTAL (Fe3 + Fe2)		Cr	Ti	V	Al	Fe3+	Fe2+	Mn	Mg	Co	Ni	Zn	Fe/3+	Fe3/Fe2	Mg#
	Forsterite zone
	V1	Magnetite	Semi-massive	V-1_a_1	Rim	0.028	0.0376	0.0096	1.1226	0.0455	87.17	0.1694	3.3	0.1747	0.0221	0.0207	92.1002	25.477	68.5621	98.9693		0.00135684	0.00106666	0.000174217	0.0499229	1.94624	0.803727	0.0054126	0.185514	0.00528612	0.000670497	0.000576549	0.974328	0.707732	0.187532
		Magnetite	Semi-massive	V-1_a_2	Core	0.0171	0.0242	0.0182	1.0797	0.0558	87.51	0.1943	3.42	0.1592	0.0035	0.0851	92.5671	25.3876	69.0392	99.484		0.00165447	0.000682589	0.000328395	0.0477402	1.94857	0.796324	0.00617266	0.19116	0.00478954	0.00010558	0.00235669	0.975277	0.709889	0.193582
		Magnetite	Semi-massive	V-1_a_3	Rim	0	0.0406	0.0322	1.1087	0.0412	87.58	0.1663	3.34	0.1924	0.0258	0.0206	92.5478	25.5654	68.9194	99.4527		0.00122224	0.00114578	0.000581317	0.0490487	1.94623	0.802331	0.00528596	0.186788	0.00579146	0.000778689	0.000570785	0.97482	0.70809	0.188843
		Magnetite	Semi-massive	V-1_a_4	Single crystal	0.0365	0.0135	0.0048	1.2009	0.043	87.5	0.1409	3.39	0.1851	0	0.062	92.5767	25.4864	68.9184	99.4815		0.00127466	0.000380697	8.65901e-05	0.0530872	1.94472	0.799241	0.0044752	0.18944	0.00556749	0	0.00171659	0.972807	0.708727	0.191609
		Magnetite	Semi-massive	V-1_a_5	Single crystal	0	0.0152	0.0045	1.0195	0.0401	87.69	0.1327	3.33	0.1709	0	0.0564	92.4593	25.5546	69.0538	99.3776		0.0011912	0.000429539	8.13491e-05	0.0451631	1.95264	0.803067	0.00422363	0.186479	0.00515119	0	0.00156483	0.976811	0.70858	0.188449
		Magnetite	Semi-massive	V-1_a_6	Single crystal	0.0229	0.0172	0.0201	1.034	0.0259	87.42	0.1396	3.3	0.1791	0	0.107	92.2658	25.4758	68.8413	99.1629		0.000771336	0.000487294	0.000364284	0.045922	1.95158	0.802626	0.00445454	0.185269	0.00541209	0	0.00297629	0.976633	0.708582	0.187539
		Magnetite	Semi-massive	V-1_a_7	Rim	0.0017	0.0517	0.0262	1.1727	0.0529	87.56	0.1473	3.29	0.156	0.0155	0.0087	92.4827	25.7109	68.7355	99.3692		0.0015706	0.00146022	0.000473381	0.0519221	1.94261	0.80755	0.00468583	0.184141	0.00469958	0.000468196	0.000241255	0.973201	0.706362	0.185684
		Magnetite	Semi-massive	V-1_a_8	Core	0.0168	0.0382	0.0307	1.2253	0.058	87.61	0.1628	3.34	0.1528	0	0	92.6346	25.688	68.8166	99.5292		0.00171842	0.00107667	0.000553529	0.0541378	1.94084	0.805146	0.0051681	0.186549	0.00459358	0	0	0.972026	0.706791	0.188111
		Magnetite	Semi-massive	V-1_a_9	Rim	0.0295	0	0.0207	1.6135	0.0572	86.66	0.132	3.67	0.1936	0.0185	0.1138	92.5088	25.0248	68.4978	99.3715		0.00168999	0	0.000372184	0.0710906	1.92645	0.782169	0.00417864	0.204408	0.00580388	0.000556091	0.00314034	0.963596	0.71123	0.207189
		Magnetite	Semi-massive	V-1_a_10	Rim	0.0111	0.0224	0	1.0337	0.0489	87.11	0.1952	3.66	0.1509	0	0.0629	92.2951	24.951	69.0799	99.2161		0.00145126	0.000632415	0	0.0457495	1.95156	0.78337	0.00620711	0.204768	0.00454413	0	0.00174355	0.976385	0.713569	0.207226
		Magnetite	Semi-massive	V-1_a_11	Core	0	0.0272	0.0093	1.1126	0.0533	87.48	0.1755	3.53	0.1531	0.0277	0.0549	92.6236	25.2781	69.1276	99.5493		0.00157743	0.000765789	0.000167496	0.049104	1.94746	0.791423	0.0055651	0.196943	0.00459751	0.000834042	0.00151755	0.974636	0.711041	0.199261
		Magnetite	Semi-massive	V-1_a_12	Rim	0	0.0116	0.001	0.9889	0.0485	87.75	0.1511	3.34	0.1829	0	0.0842	92.5582	25.5079	69.1724	99.4884		0.00143935	0.000327493	1.80603e-05	0.0437657	1.95413	0.800833	0.00480468	0.18686	0.00550763	0	0.00233392	0.97739	0.709312	0.189189
		Magnetite	Granular	V-1_b_2	Rim	0	0	0.0211	0.9826	0.0462	84.48	0.1604	6.26	0.2055	0	0.0529	92.2087	20.9425	70.6119	99.2832		0.00134392	0	0.000373521	0.0426251	1.95526	0.644472	0.00499932	0.343282	0.00606554	0	0.00143726	0.978007	0.752101	0.347538
		Magnetite	Granular	V-1_b_3	Core	0.0121	0	0.0202	1.0188	0.045	84.4	0.1592	6.45	0.1942	0.0068	0	92.3063	20.741	70.747	99.3943		0.00130559	0	0.000356654	0.0440799	1.95388	0.636602	0.00494895	0.352777	0.00571703	0.00020072	0	0.977299	0.754254	0.356564
		Magnetite	Granular	V-1_b_4	Core	0.0532	0.0018	0.0212	2.11	0.0598	82.99	0.1945	7.29	0.1505	0.0225	0.0761	92.9696	19.7426	70.2896	100.012		0.00170503	4.88226e-05	0.000367846	0.0897157	1.90772	0.595492	0.00594188	0.391834	0.00435404	0.000652678	0.00202657	0.95427	0.762109	0.396864
		Magnetite	Granular	V-1_b_5	Core	0.0172	0	0	1.2641	0.0434	84.35	0.2284	6.26	0.1792	0	0.1127	92.455	20.9521	70.4568	99.5139		0.00125804	0	0	0.0546442	1.94412	0.642506	0.00709376	0.342078	0.00527072	0	0.00305125	0.972049	0.751605	0.347434
		Magnetite	Granular	V-1_b_6	Core	0.0551	0	0.0186	1.3875	0.0456	85.37	0.1845	5.55	0.1586	0.0283	0.0454	92.8436	22.271	70.1246	99.8692		0.00132385	0	0.000328615	0.0600707	1.93793	0.684001	0.00573911	0.303747	0.004672	0.000835886	0.00123105	0.969292	0.739123	0.307514
		Magnetite	Granular	V-1_b_7	Rim	0.016	0	0.0225	1.4116	0.0479	85.26	0.1698	5.67	0.1354	0	0.0831	92.8163	22.1272	70.1622	99.8457		0.00138903	0	0.000397062	0.061044	1.93675	0.678804	0.00527579	0.309958	0.003984	0	0.00225073	0.968771	0.740474	0.313481
		Magnetite	Granular	V-1_b_8	Rim	0.0156	0.0053	0.0194	0.8935	0.0543	86.46	0.1816	4.75	0.1663	0.0158	0.0596	92.6214	23.359	70.1269	99.6473		0.00159295	0.00014791	0.000346341	0.0390889	1.95831	0.724935	0.00570812	0.262689	0.00495017	0.00047157	0.00163304	0.979649	0.729829	0.265981
		Magnetite	Semi-massive	V-1_c_1	Single crystal	0.0221	0.0122	0	1.0906	0.0487	87.13	0.1255	3.59	0.1538	0.0182	0.0567	92.2478	25.0925	68.9449	99.1552		0.00144668	0.000344764	0	0.0483131	1.94958	0.788551	0.00399449	0.20104	0.00463581	0.000550049	0.00157316	0.975112	0.712011	0.203155
		Magnetite	Semi-massive	V-1_c_2	Rim	0.0289	0.0101	0.0052	1.1093	0.0492	86.52	0.1254	4	0.1892	0.018	0.0189	92.0742	24.4118	69.0235	98.9895		0.00145924	0.000284971	9.38565e-05	0.0490643	1.94873	0.765956	0.00398504	0.223648	0.00569387	0.00054315	0.000523565	0.974729	0.717848	0.225998
		Magnetite	Semi-massive	V-1_c_3	Core	0.0088	0.0049	0.0281	1.5162	0.0432	85	0.1731	5.2	0.149	0	0.057	92.1803	22.6606	69.2804	99.1214		0.00126505	0.000136502	0.000500762	0.0662121	1.93121	0.702003	0.0054312	0.28706	0.00442727	0	0.001559	0.966239	0.733404	0.290234
		Magnetite	Semi-massive	V-1_c_4	Rim	0.0363	0.0174	0.0166	0.8927	0.0543	87.09	0.1712	3.81	0.1871	0.0241	0	92.2997	24.7214	69.3129	99.244		0.00161083	0.000491041	0.00029968	0.0394922	1.9573	0.775828	0.00544161	0.213069	0.00563182	0.000727367	0	0.979432	0.71614	0.215461
		Magnetite	Semi-massive	V-1_c_5	Single crystal	0.002	0.0048	0.0085	0.7485	0.0554	87.65	0.0945	3.23	0.1795	0.0063	0.004	91.9835	25.5749	68.9868	98.8951		0.0016572	0.000136592	0.000154733	0.0333897	1.96438	0.80932	0.0030288	0.182143	0.00544822	0.000191731	0.000111756	0.982471	0.708216	0.183711
		Magnetite	Semi-massive	V-1_c_6	Rim	0.0218	0.0166	0.0147	0.7712	0.0418	86.87	0.1442	3.93	0.1847	0	0.0465	92.0415	24.4501	69.3699	98.9915		0.00124266	0.000469463	0.000265945	0.0341899	1.96309	0.768949	0.00459318	0.220248	0.00557143	0	0.00129114	0.982271	0.718544	0.222653
		Magnetite	Semi-massive	V-1_c_7	Core	0.0199	0	0.015	0.7703	0.0598	86.89	0.1814	4.35	0.1827	0.0132	0.1268	92.6091	23.8638	70.0437	99.6266		0.00176136	0	0.000268867	0.0338347	1.96386	0.743581	0.00572477	0.241535	0.00546022	0.000395555	0.00348829	0.982197	0.725356	0.245184
		Magnetite	Semi-massive	V-1_c_8	Rim	0.0159	0.0046	0.0181	1.0718	0.0317	87.28	0.1498	3.63	0.1219	0	0	92.3238	25.1329	69.0668	99.2435		0.000940562	0.000129839	0.000326819	0.047424	1.95071	0.788883	0.00476227	0.203039	0.00366993	0	0	0.975806	0.712043	0.204693
		Magnetite	Semi-massive	V-1_c_9	Single crystal	0	0	0.0274	0.9589	0.0529	87.25	0.1508	3.75	0.1713	0.0144	0	92.3757	24.8932	69.2998	99.3187		0.00156777	0	0.000494171	0.0423795	1.95503	0.780457	0.00478853	0.209509	0.00515121	0.000434186	0	0.978015	0.714692	0.211632
		Magnetite	Semi-massive	V-1_c_10	Single crystal	0.0121	0	0.0014	1.1613	0.0569	86.58	0.1375	3.92	0.1632	0.0152	0.0409	92.0885	24.5364	68.9518	98.9966		0.00168779	0	2.52717e-05	0.0513698	1.94691	0.769945	0.00437002	0.219199	0.00491194	0.000458709	0.00113313	0.973471	0.716605	0.221604
		Magnetite	Semi-massive	V-1_c_11	Rim	0.0223	0.0206	0.045	0.5777	0.0513	87.62	0.1258	3.43	0.1712	0.0125	0	92.0764	25.2717	69.2903	99.0185		0.00153209	0.000585266	0.000817862	0.0257292	1.96986	0.798444	0.00402552	0.193111	0.00518796	0.000379808	0	0.98635	0.711576	0.194756
		Magnetite	Semi-massive	V-1_c_12	Core	0.0192	0.0074	0.0112	1.0966	0.0402	87.32	0.1569	3.67	0.1354	0.0484	0	92.5053	25.0673	69.1841	99.4367		0.00119005	0.000208396	0.000201771	0.048411	1.94958	0.785036	0.00497665	0.20481	0.00406709	0.00145771	0	0.975189	0.712926	0.206911
		Magnetite	Semi-massive	V-1_c_13	Rim	0.0104	0.0667	0.0054	1.2579	0.0444	86.78	0.1375	3.71	0.1231	0.0495	0.0466	92.2315	24.9769	68.6844	99.1128		0.00131683	0.00188188	9.74635e-05	0.0556353	1.9391	0.783663	0.00436943	0.207428	0.00370452	0.00149362	0.00129087	0.971468	0.712181	0.209292
	V3	Magnetite	Massive	V-3_a_1	Single crystal	0.0034	0.0173	0.0073	0.5346	0.0626	87.71	0.111	3.99	0.1698	0	0.0346	92.6406	24.589	70.1491	99.6687		0.00184997	0.000486357	0.000131285	0.02356	1.97336	0.768731	0.0035147	0.222284	0.0050916	0	0.000955025	0.987287	0.719655	0.224299
		Magnetite	Massive	V-3_a_2	Single crystal	0.0231	0.0016	0.0056	0.3246	0.0387	88.39	0.1296	3.85	0.1673	0.0176	0.0161	92.9642	24.8445	70.6209	100.04		0.00114232	4.49279e-05	0.000100593	0.0142884	1.98429	0.775801	0.0040988	0.214232	0.00501071	0.000528539	0.000443865	0.992284	0.718922	0.216388
		Magnetite	Massive	V-3_a_4	Single crystal	0.0231	0	0.0025	0.8045	0.0314	87.45	0.1094	4.03	0.1806	0.0154	0.0888	92.7357	24.5003	69.9588	99.7447		0.000925875	0	4.48604e-05	0.0353757	1.96363	0.764251	0.00345632	0.224013	0.00540339	0.000461987	0.00244559	0.981849	0.719837	0.226673
		Magnetite	Massive	V-3_a_5	Single crystal	0.03	0.0114	0.0248	0.8507	0.0501	87.5	0.1394	4.13	0.1551	0	0	92.8915	24.5126	70.0007	99.9047		0.00147341	0.000318939	0.00044385	0.0373093	1.95966	0.762633	0.0043926	0.22897	0.0046283	0	0	0.980594	0.719857	0.230909
		Magnetite	Massive	V-3_a_6	Single crystal	0.0128	0.0174	0	0.5189	0.0483	87.75	0.1642	3.82	0.1924	0.0037	0	92.5277	24.7553	70.0088	99.5417		0.00143119	0.000490477	0	0.0229293	1.97468	0.775999	0.00521312	0.213383	0.00578471	0.000111542	0	0.987814	0.717889	0.215673
		Magnetite	Massive	V-3_a_7	Single crystal	0.0081	0	0	0.8054	0.0358	87.06	0.1274	4.15	0.1699	0.0255	0.0972	92.4793	24.2111	69.8467	99.4771		0.00105724	0	0	0.0354697	1.9635	0.756393	0.0040312	0.231038	0.00509107	0.000766156	0.00268105	0.981737	0.721903	0.233979
		Magnetite	Massive	V-3_a_8	Single crystal	0.0158	0.0081	0.0085	1.4639	0.0474	86.75	0.1129	4.26	0.139	0	0.0117	92.8173	24.4018	69.2902	99.7593		0.00138975	0.000225923	0.000151662	0.0640066	1.93385	0.756871	0.00354671	0.235457	0.00413521	0	0.000320399	0.96729	0.718711	0.237278
		Magnetite	Massive	V-3_a_9	Single crystal	0.0118	0	0	0.6715	0.0456	87.82	0.1343	3.91	0.1568	0	0	92.75	24.767	70.0735	99.7705		0.00134613	0	0	0.0295614	1.96912	0.773462	0.00424789	0.217593	0.00469672	0	0	0.984546	0.71798	0.219557
		Magnetite	Massive	V-3_a_10	Single crystal	0.029	0	0.0196	0.846	0.0348	87.27	0.1236	4.01	0.1853	0.0048	0.0687	92.5918	24.5021	69.7567	99.5806		0.00102772	0	0.00035225	0.0372582	1.96099	0.765493	0.003911	0.223246	0.0055526	0.000144219	0.00189496	0.98085	0.719238	0.225789
		Magnetite	Massive	V-3_a_11	Single crystal	0.0368	0.0277	0.0073	0.598	0.0457	87.73	0.1438	3.7	0.1548	0	0.0503	92.4944	24.9553	69.7642	99.4839		0.00135593	0.000781841	0.000131808	0.0264592	1.97037	0.783296	0.00457144	0.206951	0.00466033	0	0.00139391	0.98608	0.715544	0.208989
		Magnetite	Massive	V-3_a_12	Single crystal	0.0048	0	0.0162	0.6851	0.0317	87.4	0.1149	4.06	0.1932	0	0.0179	92.5238	24.441	69.9691	99.5339		0.000936796	0	0.00029134	0.0301923	1.96828	0.764094	0.00363814	0.226181	0.0057932	0	0.000494068	0.984431	0.720355	0.228402
		Magnetite	Massive	V-3_b_1	Single crystal	0.1193	0.0251	0.0126	0.5712	0.0327	87.09	0.1737	3.72	0.1514	0	0.0566	91.9526	24.6803	69.3586	98.9015		0.000976547	0.000713079	0.00022899	0.0254384	1.9717	0.779719	0.00555801	0.209427	0.00458772	0	0.00157874	0.98678	0.716612	0.211725
		Magnetite	Massive	V-3_b_2	Single crystal	0.0161	0.0055	0.0032	0.6045	0.0513	87.36	0.129	4.08	0.1587	0	0.0491	92.4574	24.3642	70.0099	99.4715		0.00151754	0.000154776	5.76067e-05	0.0266671	1.97141	0.762461	0.00408871	0.227524	0.00476349	0	0.0013566	0.985905	0.721105	0.229826
		Magnetite	Massive	V-3_b_3	Single crystal	0.025	0	0.0099	0.6974	0.0505	86.75	0.144	4.16	0.1618	0	0.02	92.0186	24.1122	69.6121	98.9929		0.00149926	0	0.000178863	0.0308761	1.96727	0.757292	0.00458059	0.232821	0.00487404	0	0.000554578	0.983809	0.72205	0.235146
		Magnetite	Massive	V-3_b_4	Single crystal	0.0309	0.0005	0.0178	0.5267	0.042	86.92	0.1423	3.95	0.146	0.0016	0	91.7778	24.3633	69.5219	98.7431		0.00125319	1.41924e-05	0.000323212	0.0234362	1.97462	0.769036	0.00454932	0.222182	0.00442024	4.85707e-05	0	0.987651	0.719704	0.224151
		Magnetite	Massive	V-3_b_5	Single crystal	0.011	0	0.0185	0.7422	0.0586	87.02	0.1275	4.1	0.1799	0.0152	0.0501	92.323	24.2749	69.7313	99.3092		0.0017346	0	0.000333252	0.0327626	1.96482	0.760153	0.00404376	0.228786	0.00540328	0.000457753	0.00138512	0.982746	0.721042	0.231345
		Magnetite	Massive	V-3_b_6	Single crystal	0.0307	0.0323	0.0066	0.7137	0.0465	87.51	0.1208	4.03	0.181	0.0234	0.0316	92.7266	24.5444	69.9764	99.7374		0.00137187	0.000906524	0.000118496	0.0314	1.96519	0.766044	0.00381856	0.224134	0.00541829	0.000702362	0.000870749	0.983597	0.719524	0.226358
		Magnetite	Massive	V-3_b_7	Single crystal	0.0173	0.0111	0.0063	0.8667	0.0444	87.53	0.1614	4.04	0.1873	0.0014	0.0356	92.9015	24.5651	69.9756	99.9122		0.00130635	0.000310684	0.000112802	0.0380279	1.95983	0.764608	0.00508809	0.22408	0.00559166	4.19075e-05	0.000978307	0.980325	0.719352	0.226644
		Magnetite	Massive	V-3_b_8	Single crystal	0.0249	0	0.0051	0.9014	0.0434	87.06	0.1475	4.15	0.2007	0	0.1305	92.6635	24.2255	69.8307	99.6597		0.001279	0	9.1464e-05	0.0396144	1.95894	0.755258	0.00465743	0.230554	0.0060014	0	0.00359201	0.979552	0.721738	0.233872
		Magnetite	Massive	V-3_b_9	Single crystal	0.0325	0.0046	0.0163	0.7626	0.044	87.1	0.1393	4.09	0.1292	0.0228	0.0444	92.3857	24.3454	69.7418	99.373		0.00130181	0.000129471	0.000293484	0.0336472	1.96419	0.762003	0.00441593	0.228121	0.00387869	0.000686306	0.00122695	0.982518	0.720489	0.230396
		Magnetite	Massive	V-3_b_10	Single crystal	0.035	0.0104	0.0016	0.6654	0.036	87.35	0.1417	4.09	0.1624	0	0.0791	92.5716	24.349	70.0157	99.5863		0.00106355	0.000292286	2.87658e-05	0.0293153	1.969	0.760991	0.00448539	0.227784	0.00486819	0	0.00218263	0.984806	0.721248	0.23037
		Magnetite	Massive	V-3_b_11	Single crystal	0.0129	0.0001	0.0147	0.7749	0.0426	87.04	0.1428	4.07	0.1968	0.0029	0	92.2977	24.3414	69.6797	99.2788		0.00126138	2.81679e-06	0.000264883	0.0342167	1.96398	0.762472	0.00453042	0.227183	0.00591271	8.73616e-05	0	0.982256	0.720343	0.229558
		Magnetite	Massive	V-3_b_12	Single crystal	0.0174	0	0	0.6647	0.0386	87.2	0.1595	4.02	0.1422	0.0114	0.0773	92.3311	24.3638	69.8326	99.3275		0.00114365	0	0	0.0293689	1.96951	0.763648	0.00506338	0.224531	0.00427495	0.000343635	0.00213911	0.984744	0.720599	0.227217
	Periclase zone
	V10	Magnetite	Granular	V-10A_a_1	Rim	0.0715	0.0044	0	1.1017	0.0383	82.83	0.1357	7.05	0.1528	0	0.0682	91.4526	19.54	70.3369	98.4995		0.00111592	0.000121957	0	0.0478689	1.9508	0.602283	0.00423631	0.387229	0.00451734	0	0.00185595	0.975505	0.764095	0.391333
		Magnetite	Granular	V-10A_a_2	Core	0.0257	0.0012	0.0079	1.0847	0.0395	83.57	0.1595	7.33	0.1164	0.042	0.0619	92.4388	19.4318	71.2795	99.5801		0.00113636	3.28412e-05	0.000138308	0.0465356	1.95199	0.591393	0.00491648	0.397528	0.0033978	0.00122929	0.00166325	0.97616	0.767478	0.401982
		Magnetite	Granular	V-10A_a_3	Core	0.001	0.0024	0.0189	0.8829	0.0536	84.56	0.1432	6.48	0.1605	0.0458	0.0333	92.3816	20.6873	70.9845	99.4934		0.00155432	6.62073e-05	0.000333532	0.0381807	1.95945	0.634632	0.00444931	0.354238	0.00472255	0.00135123	0.000901919	0.980124	0.755354	0.358225
		Magnetite	Granular	V-10A_a_4	Rim	0	0.0096	0.0225	0.8405	0.0488	84.91	0.1669	6.19	0.1837	0.0306	0.0347	92.4373	21.1162	70.8968	99.5403		0.00141786	0.000265341	0.00039783	0.0364174	1.96081	0.649042	0.00519572	0.33904	0.00541564	0.00090453	0.000941656	0.98107	0.751311	0.343129
		Magnetite	Granular	V-10A_a_5	Rim	0.02	0	0.0181	0.4311	0.0459	86.52	0.0925	4.8	0.1325	0.051	0	92.1111	23.1867	70.385	99.1628		0.00135576	0	0.000325347	0.018989	1.97899	0.72452	0.00292742	0.267273	0.00397109	0.00153259	0	0.989824	0.732008	0.269485
		Magnetite	Granular	V-10A_a_6	Core	0.0388	0	0.0202	1.2068	0.0472	84.25	0.1616	6.9	0.1689	0	0.0188	92.8123	20.2533	71.1223	99.9379		0.00135683	0	0.000353374	0.0517338	1.94618	0.615916	0.00497736	0.373919	0.0049265	0	0.000504765	0.973445	0.759605	0.377759
		Magnetite	Granular	V-10A_a_7	Rim	0.0674	0	0.0067	0.7069	0.054	86.09	0.1111	4.36	0.149	0.0382	0.0386	91.6219	23.653	69.389	98.5738		0.00160791	0	0.000121407	0.0313894	1.96677	0.745069	0.00354452	0.244737	0.00450174	0.00115723	0.0010735	0.983499	0.725253	0.247258
		Magnetite	Granular	V-10A_a_8	Rim	0.0242	0	0.0172	1.3089	0.0394	83.05	0.1734	7.66	0.1426	0	0.0354	92.4511	18.993	71.1893	99.5834		0.00112929	0	0.000300012	0.0559464	1.94231	0.575898	0.00532516	0.413888	0.0041472	0	0.000947677	0.971453	0.771307	0.418159
		Magnetite	Granular	V-10A_a_9	Core	1.1137	0	0	1.1147	0.0232	82.64	0.1421	7	0.1828	0.0014	0	92.2179	19.5479	70.117	99.2428		0.00067807	0	0	0.0485848	1.95076	0.604405	0.00444994	0.385682	0.00542111	4.16295e-05	0	0.975369	0.763458	0.389543
		Magnetite	Granular	V-10A_a_10	Rim	0.0077	0.0067	0.0301	0.7019	0.0519	86.71	0.0659	4.63	0.1919	0.0122	0.0325	92.4408	23.5829	70.1558	99.4696		0.00152802	0.000187652	0.000539296	0.0308171	1.96616	0.734515	0.00207884	0.256972	0.00573272	0.000365432	0.000893699	0.983815	0.728025	0.259178
		Magnetite	Granular	V-10A_b_1	Rim	0.019	0.005	0.0121	0.2264	0.0349	87.08	0.0927	4.78	0.1571	0.0596	0.0044	92.4712	23.2755	70.9087	99.5754		0.00102805	0.000140113	0.000216908	0.00994541	1.98831	0.725323	0.0029258	0.265438	0.00469561	0.00178617	0.000121057	0.994511	0.732712	0.267913
		Magnetite	Granular	V-10A_b_2	Core	0.0328	0	0.0042	0.9811	0.0366	84.26	0.0931	6.95	0.1661	0.0229	0.0254	92.5722	20.1066	71.2965	99.7152		0.00105518	0	7.36878e-05	0.0421809	1.95663	0.613235	0.00287588	0.377725	0.00485894	0.00067169	0.000683956	0.978381	0.761375	0.381171
		Magnetite	Granular	V-10A_b_3	Rim	0.0322	0	0.0053	0.7791	0.0448	84.66	0.1106	6.4	0.2094	0.0065	0.0776	92.3255	20.742	71.0349	99.4423		0.00130173	0	9.37174e-05	0.0337593	1.96476	0.637584	0.00344329	0.350566	0.00617372	0.000192152	0.00210598	0.982468	0.754997	0.35477
		Magnetite	Granular	V-10A_b_4	Rim	0.0077	0.0149	0.0117	0.635	0.0359	86.17	0.1295	5.32	0.1543	0	0.0186	92.4976	22.5413	70.7133	99.5822		0.00105066	0.000414833	0.000208379	0.0277139	1.96999	0.697896	0.0040608	0.293511	0.00458205	0	0.000508427	0.985609	0.738409	0.296055
		Magnetite	Granular	V-10A_b_5	Core	0.0319	0	0.0103	1.0186	0.0497	85.64	0.0811	5.62	0.1579	0.0149	0.0175	92.6419	22.1955	70.5086	99.706		0.0014469	0	0.000182481	0.0442223	1.95397	0.68358	0.00252974	0.308434	0.00466433	0.00044132	0.000475846	0.977161	0.740827	0.310917
		Magnetite	Granular	V-10A_b_6	Rim	0.0008	0.0119	0.0325	0.7174	0.0411	86.53	0.087	5.14	0.2197	0.0203	0.0457	92.8464	22.8838	70.7328	99.933		0.0011999	0.000330498	0.000577413	0.0312335	1.9657	0.706763	0.00272143	0.282886	0.00650817	0.000602956	0.00124614	0.983768	0.735539	0.285845
		Magnetite	Granular	V-10A_b_7	Rim	0.0131	0.0123	0.0123	0.8298	0.0482	84.97	0.1345	6.02	0.1365	0.001	0.0595	92.2372	21.3857	70.6639	99.3169		0.00140546	0.000341189	0.000218261	0.0360829	1.96139	0.659688	0.00420212	0.330912	0.00403859	2.9666e-05	0.00162045	0.981245	0.748314	0.334052
		Magnetite	Granular	V-10A_b_8	Core	0.0183	0	0.0313	0.6694	0.0357	86.97	0.1186	4.81	0.1785	0	0.0601	92.8919	23.3927	70.6562	99.9708		0.0010449	0	0.00055751	0.029218	1.96858	0.724322	0.00371935	0.265398	0.00530117	0	0.00164297	0.98486	0.731025	0.268155
		Magnetite	Granular	V-10A_b_9	Rim	0.0322	0.0074	0.0233	0.8837	0.059	85.53	0.1081	5.95	0.1488	0.0142	0	92.7567	21.7223	70.9122	99.8612		0.00171208	0.000204278	0.00041146	0.0382413	1.95879	0.666839	0.00336103	0.325487	0.00438127	0.000419225	0	0.980011	0.746027	0.328004
		Magnetite	Granular	V-10A_b_10	Core	0.0205	0	0.0268	0.8702	0.055	84.44	0.154	6.77	0.1827	0.0348	0	92.554	20.3048	71.2762	99.695		0.0015888	0	0.00047113	0.037487	1.95995	0.620508	0.00476651	0.368671	0.00535513	0.00102275	0	0.980453	0.759535	0.372704
		Magnetite	Granular	V-10A_b_12	Rim	0.1076	0	0.0263	0.8784	0.049	84.82	0.1205	5.41	0.1667	0.0323	0.0195	91.6303	22.0718	69.7348	98.6169		0.001446	0	0.000472311	0.0386563	1.95892	0.689052	0.00381008	0.300964	0.00499153	0.000969754	0.00053747	0.979939	0.739781	0.303999
		Magnetite	Granular	V-10A_b_13	Core	0.0199	0.0098	0.0065	1.4824	0.0403	83.26	0.136	7.13	0.1534	0.0188	0.069	92.3261	19.7655	70.5642	99.3958		0.00116059	0.000268483	0.000113916	0.063664	1.93442	0.602176	0.00419648	0.387085	0.00448253	0.000550829	0.00185596	0.967575	0.762605	0.391287
		Magnetite	Granular	V-10A_b_14	Rim	0.0705	0.0036	0	1.4941	0.0413	83.04	0.1817	7.46	0.1681	0.0567	0.025	92.541	19.2555	70.8865	99.643		0.00118418	9.81951e-05	0	0.0638859	1.93476	0.584072	0.0055821	0.40323	0.0048906	0.00165401	0.000669509	0.967462	0.768118	0.408416
		Magnetite	Granular	V-10A_b_15	Rim	0.0268	0.0043	0.0191	0.4613	0.0415	86.62	0.0793	4.78	0.1417	0.0319	0.1335	92.3394	23.1991	70.4823	99.4009		0.00122321	0.00012057	0.0003426	0.0202765	1.97756	0.723383	0.00250439	0.265599	0.00423789	0.000956602	0.00367522	0.989245	0.732174	0.268558
		Magnetite	Semi-massive	V-10A_c_1	Rim	0.0095	0	0.008	0.5692	0.031	89.17	0.0829	2.42	0.1272	0	0	92.4178	26.9934	69.0995	99.3407		0.000930015	0	0.000146056	0.0254653	1.97332	0.8567	0.00266475	0.136864	0.00387205	0	0	0.9868	0.697281	0.13775
		Magnetite	Semi-massive	V-10A_c_2	Core	0.0005	0.0137	0.0342	0.0844	0.0326	89.44	0.0378	2.43	0.1582	0	0.0306	92.262	26.8709	69.5358	99.2286		0.00098164	0.000392441	0.000626702	0.00378995	1.99314	0.855971	0.00121955	0.137939	0.00483356	0	0.000860605	0.997612	0.699565	0.138784
		Magnetite	Semi-massive	V-10A_c_3	Rim	0.0304	0.0108	0.0117	0.3526	0.0497	89.19	0.0572	2.49	0.1426	0.0116	0.069	92.4156	26.7959	69.3412	99.3627		0.00149212	0.000308453	0.000213763	0.0157865	1.98168	0.851056	0.00184	0.140926	0.00434402	0.000354317	0.00193483	0.991356	0.699563	0.142065
		Magnetite	Semi-massive	V-10A_c_4	Rim	0.4169	0.007	0.0075	0.4934	0.0499	86.97	0.0488	2.44	0.168	0.0075	0.0654	90.6744	26.1684	67.5715	97.4442		0.00153233	0.000204488	0.000140156	0.0225947	1.97519	0.850101	0.00160563	0.141249	0.00523463	0.000234315	0.00187576	0.987932	0.69911	0.142482
		Magnetite	Semi-massive	V-10A_c_5	Core	0.0278	0	0.0162	0.3434	0.0426	89.48	0.0441	2.21	0.1783	0.0205	0.0156	92.3785	27.2205	69.1917	99.3107		0.00128238	0	0.000296772	0.0154157	1.9827	0.866855	0.0014224	0.125414	0.00544609	0.00062784	0.000438612	0.991648	0.695792	0.126391
		Magnetite	Semi-massive	V-10A_c_6	Rim	0.0083	0.0109	0.0251	0.627	0.0432	89.02	0.0566	2.48	0.1324	0.061	0.0821	92.5466	26.8547	69.087	99.4683		0.00129351	0.000310479	0.000457362	0.0279969	1.96914	0.850647	0.00181584	0.139986	0.00402254	0.00185825	0.00229603	0.985343	0.69833	0.141309
		Magnetite	Semi-massive	V-10A_c_7	Rim	0.0043	0.0152	0.0075	0.7316	0.0433	88.75	0.0491	2.5	0.1553	0	0.012	92.2683	26.8543	68.7874	99.16		0.0012993	0.000433894	0.000136957	0.0327379	1.96483	0.852466	0.00157862	0.141419	0.00472845	0	0.000336318	0.982972	0.697417	0.142289
		Magnetite	Semi-massive	V-10A_c_9	Rim	0.0268	0.002	0.0199	0.0829	0.0498	89.99	0.0453	2.28	0.1781	0.0244	0.0458	92.745	27.1711	69.8133	99.7394		0.0014942	5.70857e-05	0.000363355	0.00370928	1.99394	0.862439	0.0014563	0.128961	0.00542211	0.000744826	0.00128349	0.997397	0.698065	0.13008
		Magnetite	Semi-massive	V-10A_c_10	Rim	0.026	0.0075	0.0161	0.1615	0.0285	90.21	0.0386	2.37	0.1772	0.036	0.062	93.1334	27.1599	70.0703	100.154		0.000850697	0.000212966	0.000292453	0.00718883	1.99094	0.857632	0.0012345	0.133359	0.00536685	0.00109325	0.0017285	0.995978	0.698925	0.134572
		Magnetite	Semi-massive	V-10A_c_11	Core	0.0005	0.0189	0	0.387	0.0352	89.02	0.066	3.15	0.1811	0.0296	0	92.8883	25.9672	70.0733	99.9088		0.00104528	0.00053391	0	0.0171378	1.98077	0.815746	0.00209994	0.176337	0.00545672	0.000894265	0	0.990904	0.7083	0.177744
		Magnetite	Semi-massive	V-10A_c_12	Rim	0.0287	0.0171	0.0133	0.1424	0.047	90.3	0.1055	2.16	0.2025	0	0.004	93.0205	27.4418	69.8571	100.019		0.00140707	0.000487003	0.000242308	0.00635745	1.99077	0.869103	0.0033841	0.121903	0.00615131	0	0.000111847	0.996115	0.696104	0.12301
	Mg#: Mg/(Mg+Fe2+); Fe/3+ = Fe3+/(Fe3+Al+Cr)
	Magnetite based on 4O
