# Supplementary material for: Micro- to nano-sized solid inclusions in magnetite record skarn reactions
Source: Copernicus journal article supplement (doi:10.5194/ejm-36-925-2024), 2024-10-29
Supplement: Supplementary file 1 [file ejm-36-925-2024-supplement.zip]

# Thin Foil 1

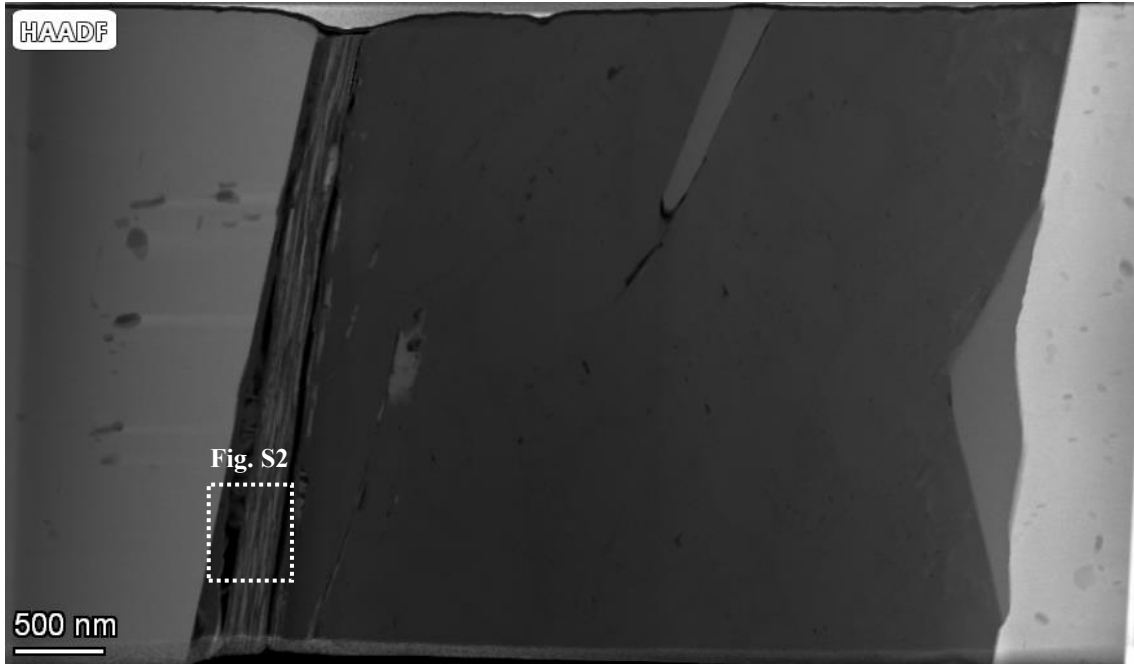

**Figure S1.** HAADF image of thin foil 1 including the location of HRTEM images of the next figure.

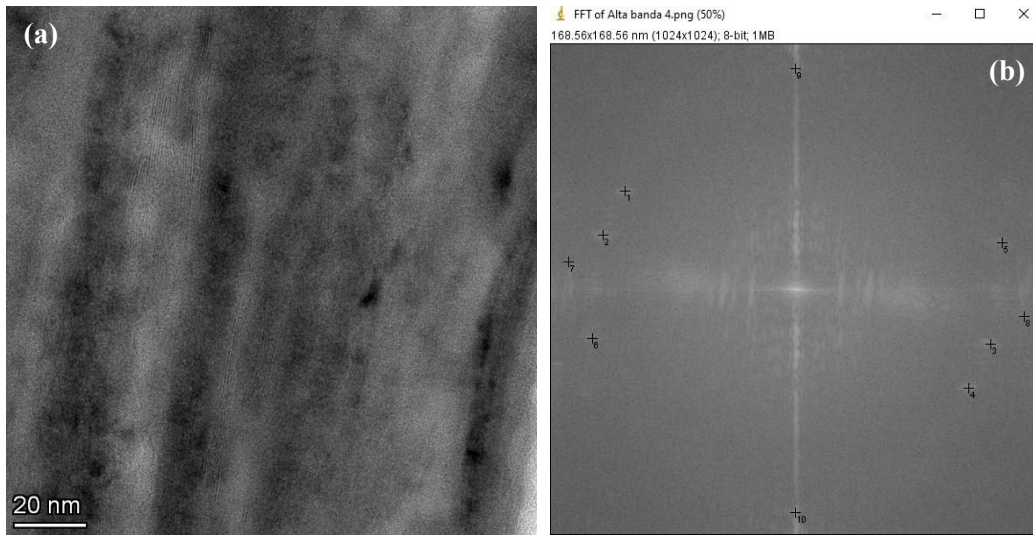

**Figure S2.** HRTEM image collected from the left part of thin foil 1 marked in figure S1, and corresponding FFT pattern.

| Point | Distance (Å) | (hkl) chamosite |
|-------|--------------|-----------------|
| 1     | 4.09         | $\bar{1}12$     |
| 2     | 4.01         | $\bar{1}12$     |
| 3     | 4.02         | $\bar{1}12$     |

|    |      |             |
|----|------|-------------|
| 4  | 4.07 | $\bar{1}12$ |
| 5  | 3.83 | 022         |
| 6  | 3.84 | 022         |
| 7  | 3.51 | 004         |
| 8  | 3.52 | 004         |
| 9  | 3.65 | 112         |
| 10 | 3.62 | 112         |

**Table S1.** D-spacings obtained from different points in the FFT pattern of Figure S2, and corresponding (hkl)

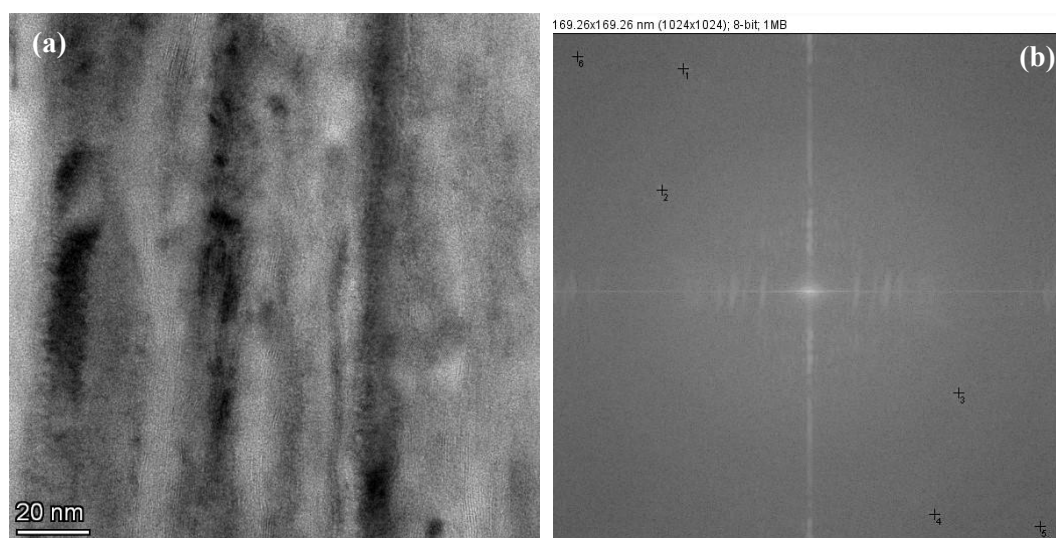

**Figure S3.** A second HRTEM image collected from the left part of thin foil 1 marked in Figure S1, and the corresponding FFT pattern

| Point | Distance (Å) | (hkl) chlorite |
|-------|--------------|----------------|
| 1     | 3.32         | 116            |
| 2     | 4.74         | 006            |
| 3     | 4.72         | 006            |
| 4     | 3.33         | 116            |
| 5     | 2.58         | $20\bar{2}$    |
| 6     | 2.57         | $20\bar{2}$    |

**Table S2.** D-spacings obtained from different points in the FFT pattern of Figure S3, and corresponding (hkl)

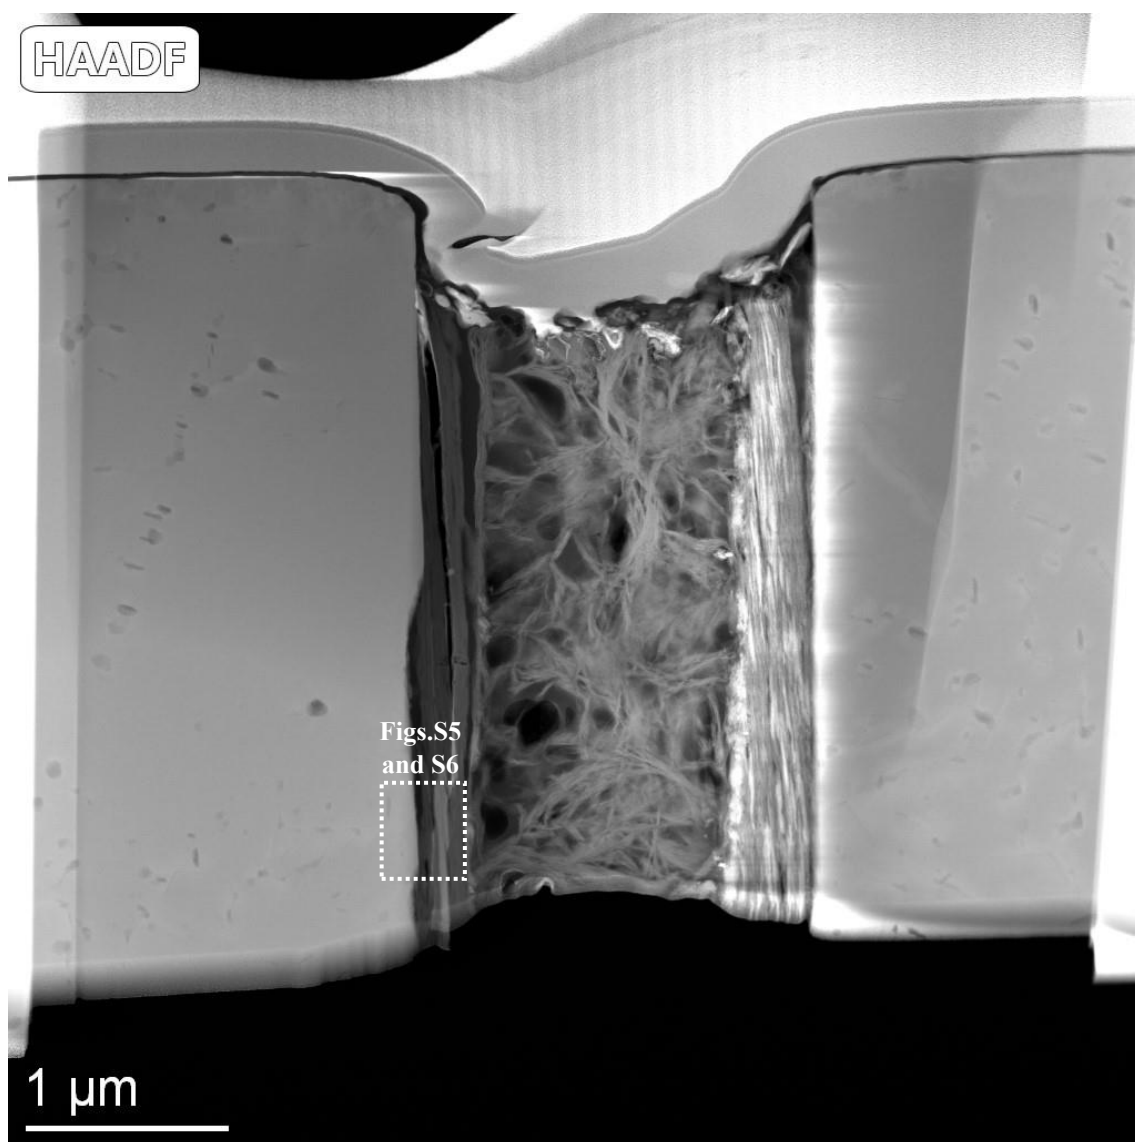

**Figure S4.** HAADF image of thin foil 2 including the location of HRTEM images of the next slide.

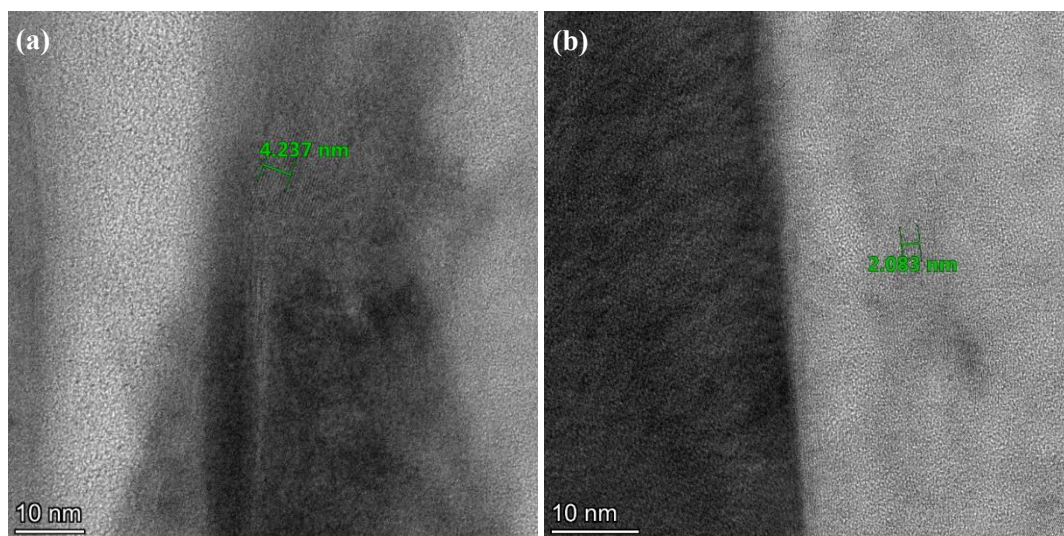

**Figure S5.** HRTEM images of the left region of thin foil 2. (a) A measured d-spacing of 4.237 Å (a) corresponding to (1 $\bar{1}$ 1) of chamosite. (b) A measured d-spacing of 2.083 Å corresponding to ( $\bar{2}$ 05) of chamosite.



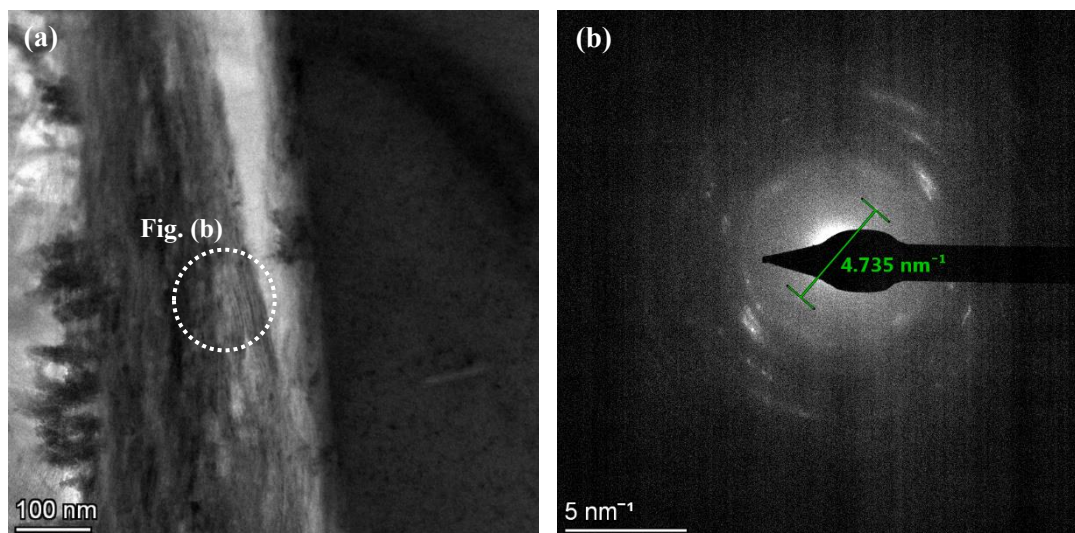

**Figure S6.** (a) HAADF image of the right part of the thin foil 2 showing the location of the SAED pattern in (d). and the d-spacing of  $4.22 \text{ Å}$  calculated in (c) correspond to  $(1\bar{1}1)$  of chamosite.

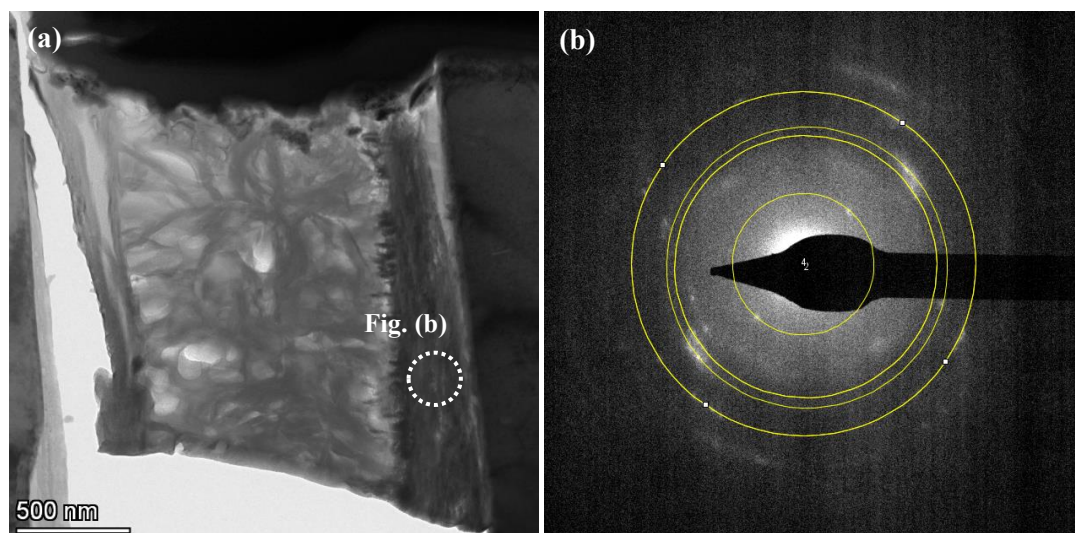

**Figure S7.** (a) HAADF image of the right part of the thin foil 2 showing the location of the SAED pattern in (b).

| Circle    | Distance (Å) | (hkl) chamosite |
|-----------|--------------|-----------------|
| 1 (inner) | 4.19         | $\bar{1}11$     |
| 2         | 2.26         | $(\bar{2}04)$   |
| 3         | 2.10         | —               |
| 4 (outer) | 1.72         | $207^*$         |

**Table S3.** D-spacings obtained from SAED diffraction pattern in Figure S2, and corresponding (hkl). \*The d-spacing of  $1.72 \text{ Å}$  corresponds to  $(207)$  of monoclinic polytype IIb chlorite
