# Supplementary material for: Micro- to nano-sized solid inclusions in magnetite record skarn reactions
Source: Copernicus journal article supplement (doi:10.5194/ejm-36-925-2024), 2024-10-29
Supplement: Supplementary file 2 [file ejm-36-925-2024-supplement.zip]

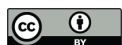

## *Supplement of*

# **Micro- to nano-sized solid inclusions in magnetite record skarn reactions**

**Igor González-Pérez et al.**

*Correspondence to:* Igor González-Pérez (igorgonzpe@ugr.es)

- ejm-36-925-2024-supplement-title-page.pdf
- Supplement 1 - EPMA.xlsx
- Supplement 2 - TEM .pdf

The copyright of individual parts of the supplement might differ from the article licence.
